# Supplementary material for: The Flavonoid Isoquercitrin Precludes Initiation of Zika Virus Infection in Human Cells
Source: Int J Mol Sci. 2018 Apr 5;19(4):1093. doi: 10.3390/ijms19041093 (PMC5979602; doi:10.3390/ijms19041093)
Supplement: Supplementary file 1 [file ijms-19-01093-s001.pdf]

# The Flavonoid Isoquercitrin Precludes Initiation of Zika Virus Infection in Human Cells

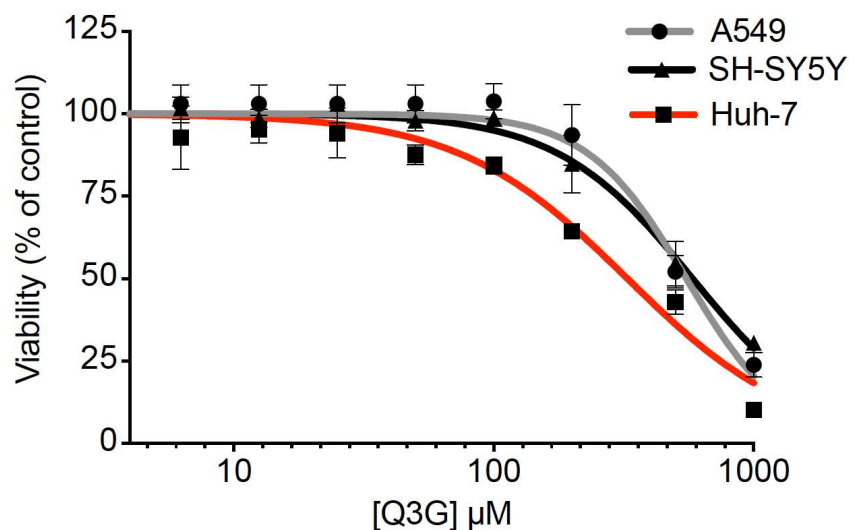

**Figure S1.** Three human cell lines were evaluated for their sensitivity to increasing concentrations of Q3G using a MTT assay. The cytotoxic test was performed 72 h post-treatment. Data represent the means  $\pm$  SD of four independent experiments performed in triplicate.

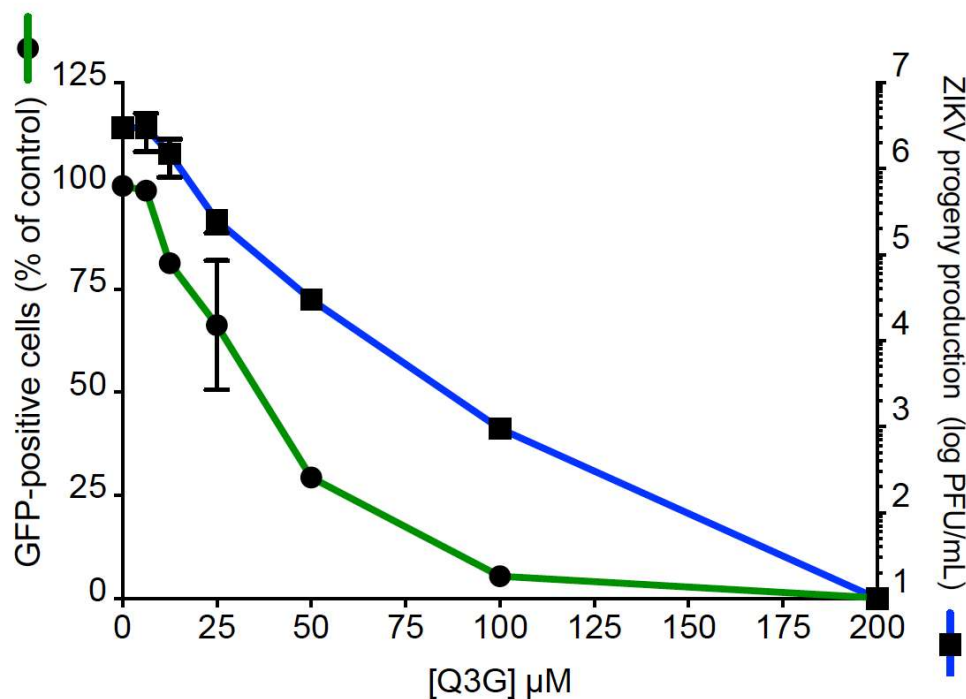

**Figure S2.** Antiviral effect of Q3G on mutant ZIKV expressing GFP. A549 cells were infected with ZIKV<sub>GFP</sub> in presence of increasing concentrations of Q3G. At 24 h p.i., the percentage of GFP-expressing cells was determined by FACS analysis (left axis) and virus progeny production was assessed (right axis). The data represent the means  $\pm$  SD of four independent experiments performed in triplicate and are expressed as relative values compared to vehicle.

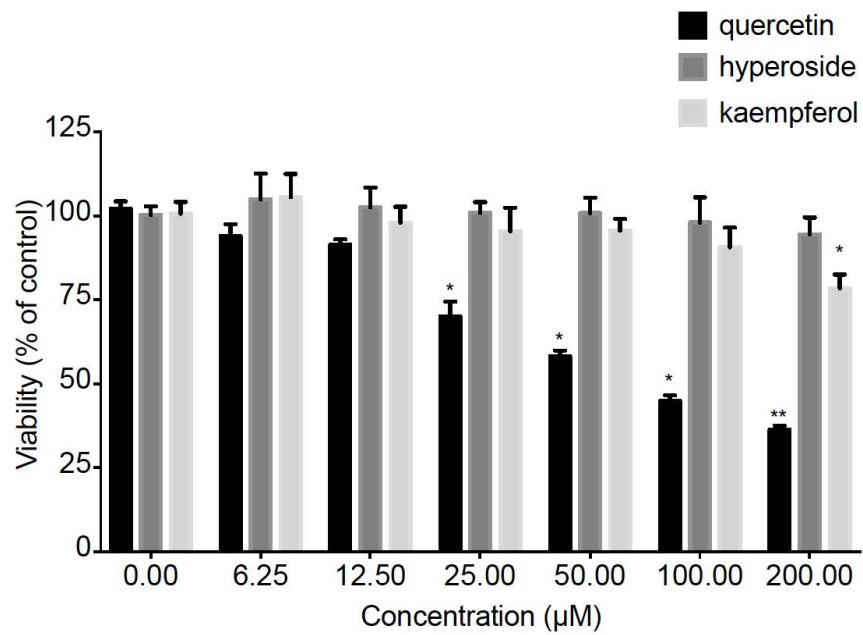

**Figure S3.** Cytotoxicity of selected flavonoids. Different concentrations of flavonoids were used to treat A549 cells to determine cytotoxicity using MTT assay. The cytotoxic test was performed 72 h post-treatment. Data represent the means  $\pm$  SD of four independent experiments performed in triplicate.
